# Supplementary material for: Dynamic assembly of the mRNA m6A methyltransferase complex is regulated by METTL3 phase separation
Source: PubMed Central journal article supplement (PMC8865655; doi:10.1371/journal.pbio.3001535), 2022-02-10
Supplement: pbio.3001535.s005.pdf [file pbio.3001535.s005.pdf]

# Original images (blots) of Fig. 2E

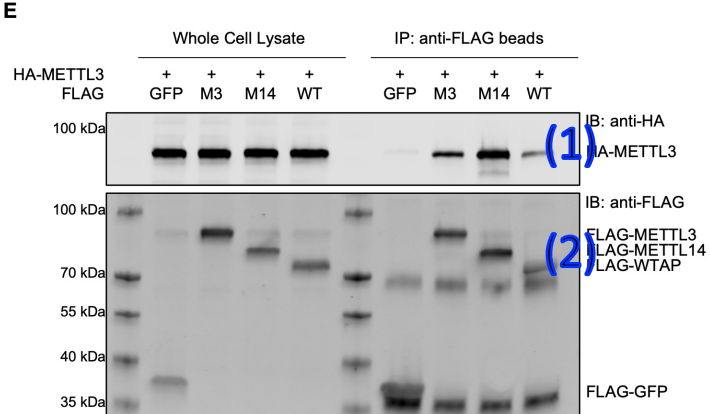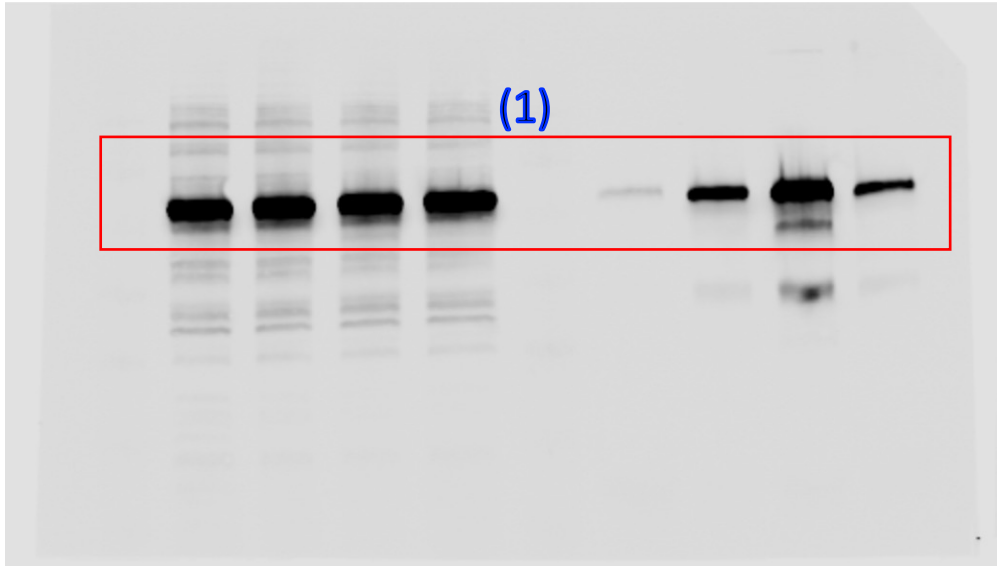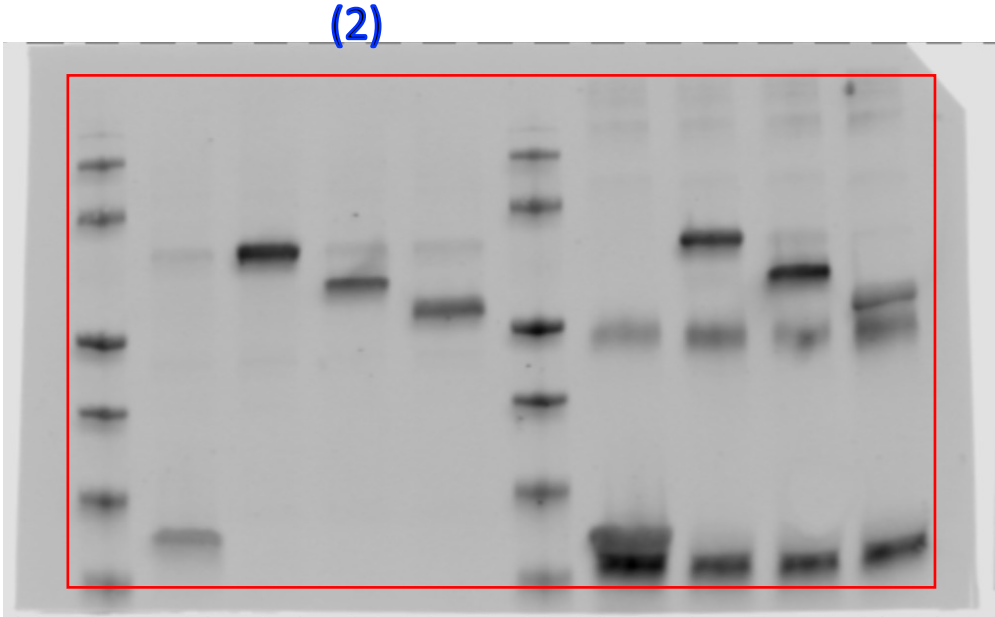

Original scans from Li-cor scanner

# Original images (blots) of S3A Fig

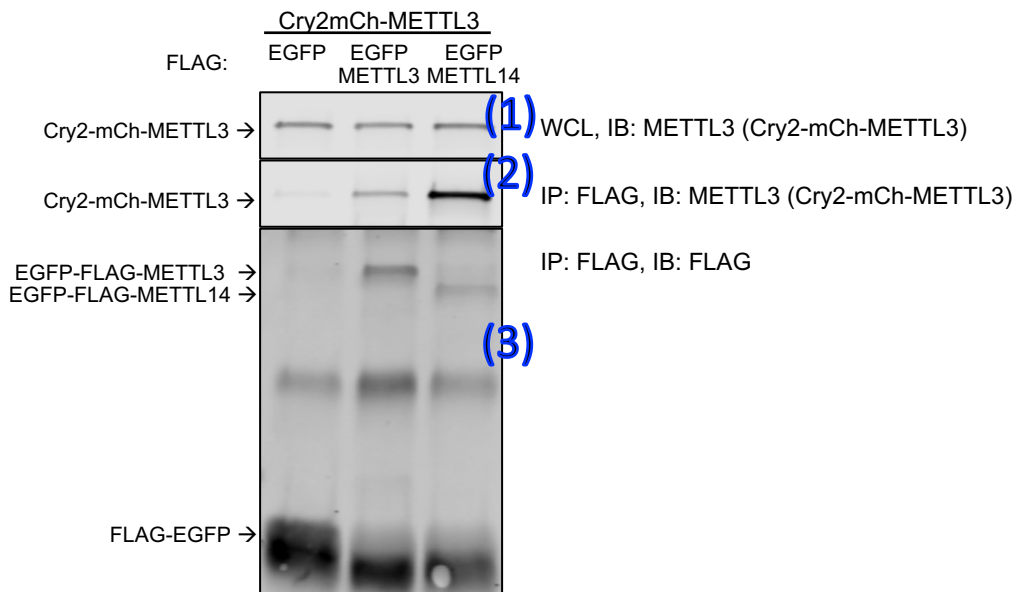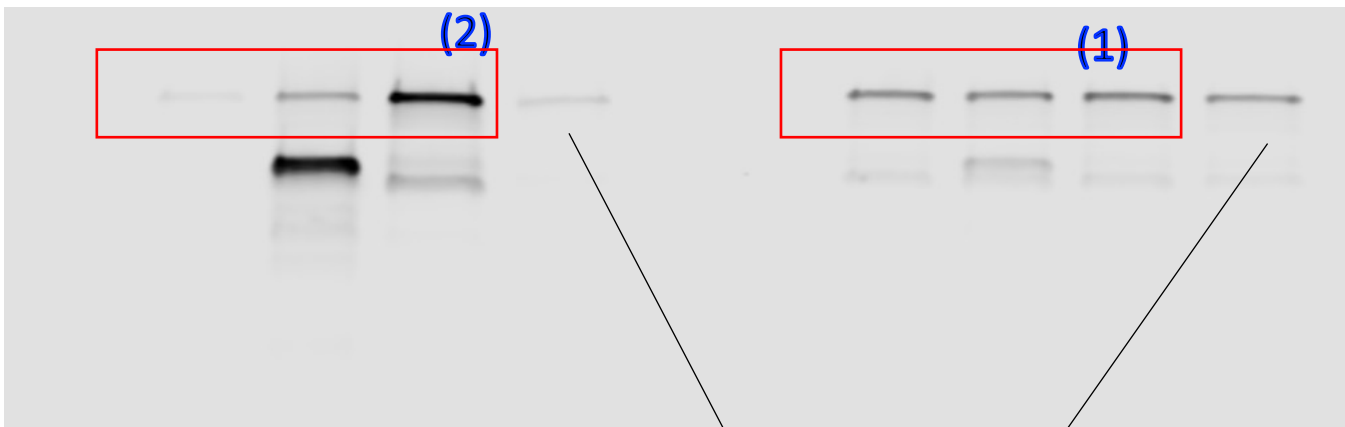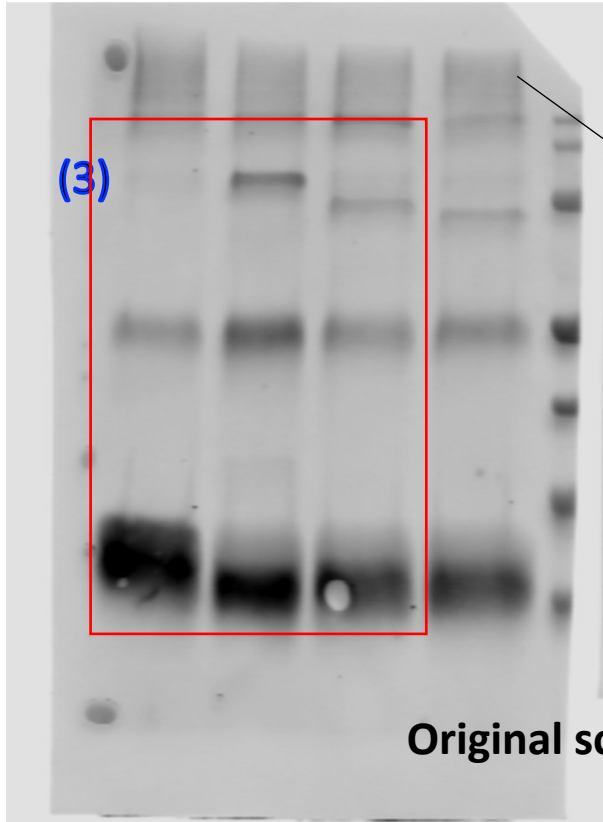

Mis-loaded sample  
(Out of the scope of the paper)

Original scans from Li-cor scanner

# Original images (blots) of S4A and S4B Figs

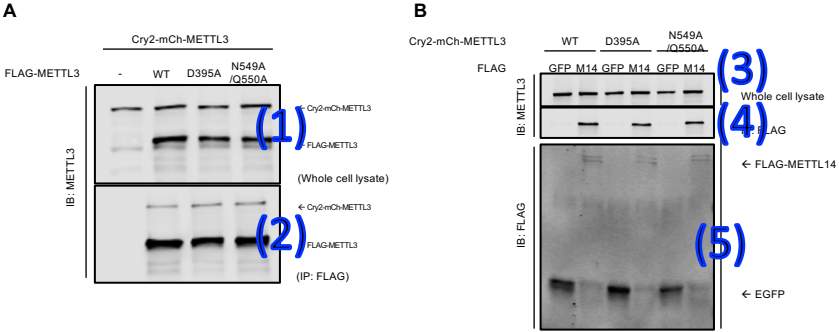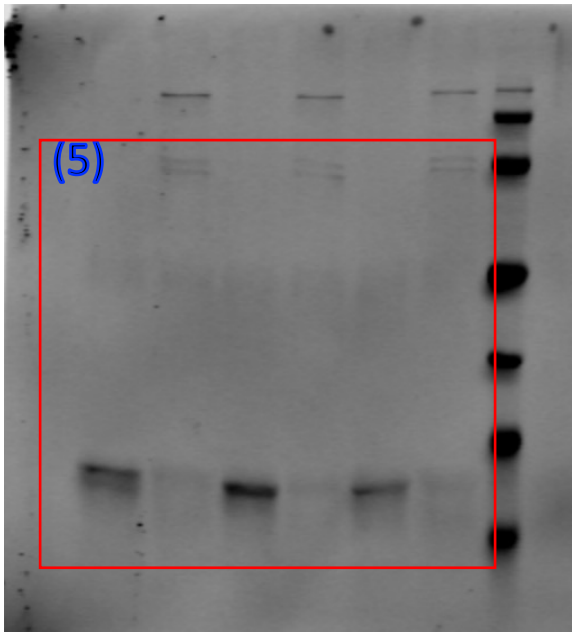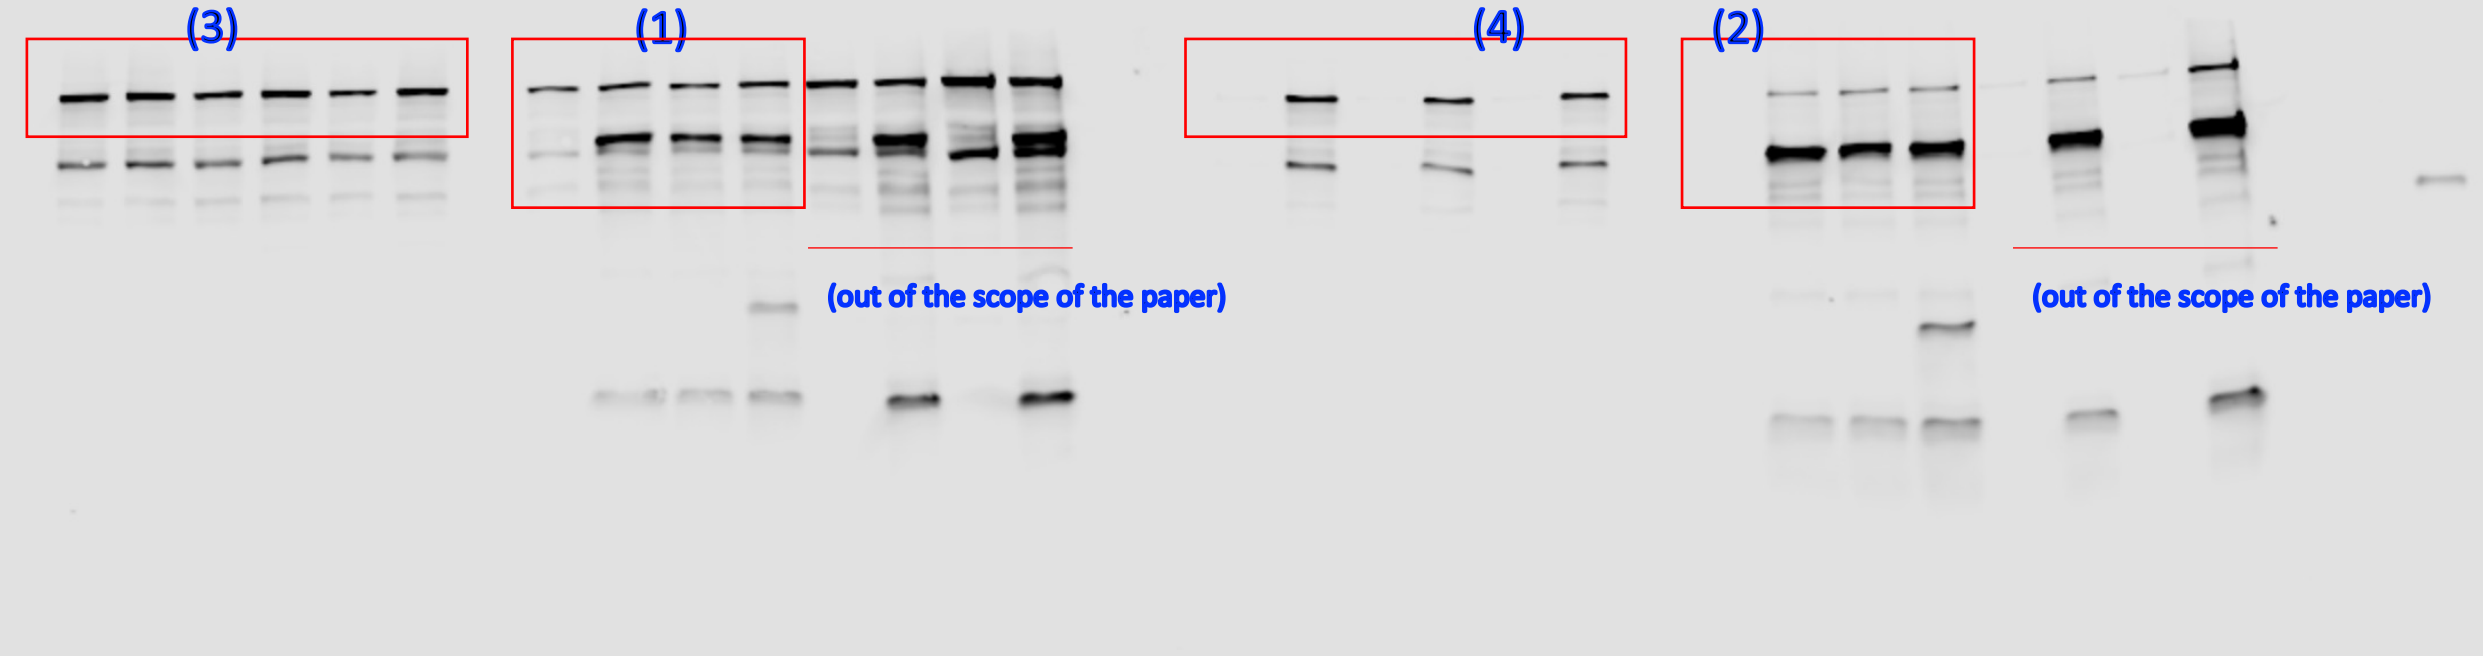

Original scans from Li-cor scanner
